# Supplementary material
Source: PubMed Central journal article supplement (PMC10192449)
Supplement: NIHMS1847231-supplement-1.pdf [file NIHMS1847231-supplement-1.pdf]

**Supplemental Figure 1.** Flow diagram depicting participant enrollment and progress through the study.

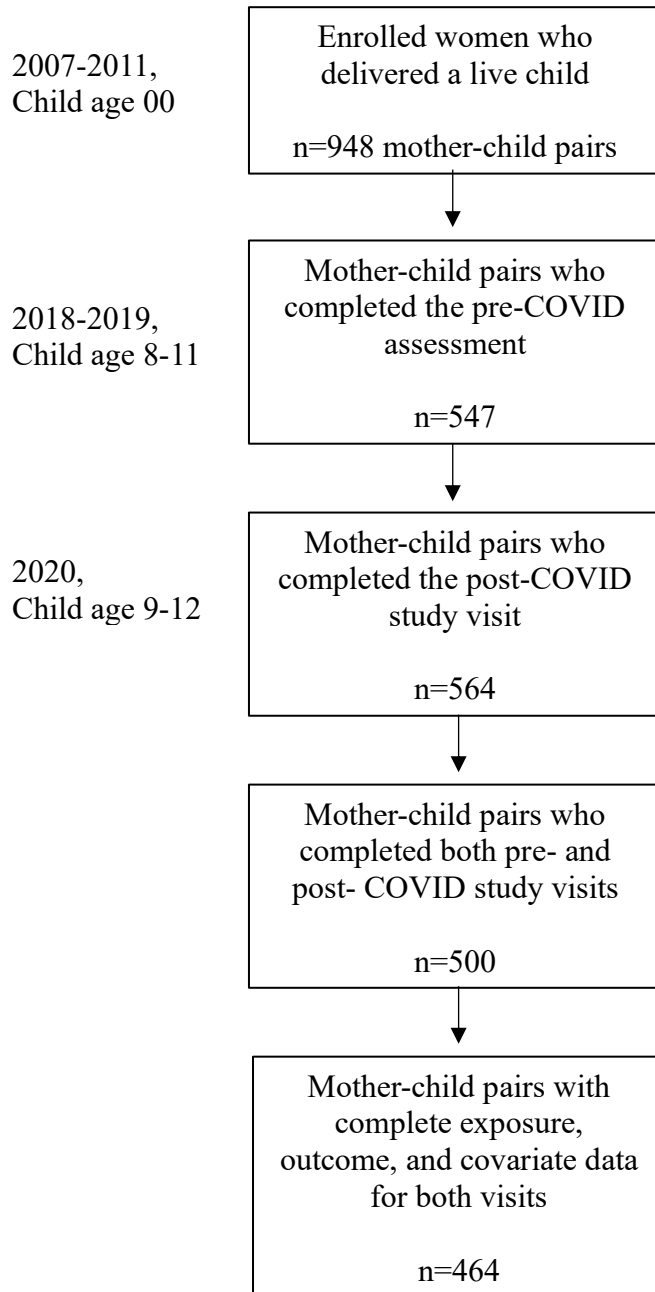

**Supplemental Figure 2.** Directed Acyclic Graphs (DAG) displaying assumed conditional dependencies between exposures, anxiety and depressive symptoms, and relevant covariates. Separate DAGs are displayed for A) negative life events and B) social support.

*Note.* NLE = negative life event; T1 = time 1 (before COVID); T2 = time 2 (during COVID); SES = socioeconomic status.

1) DAG for maternal-reported negative life events

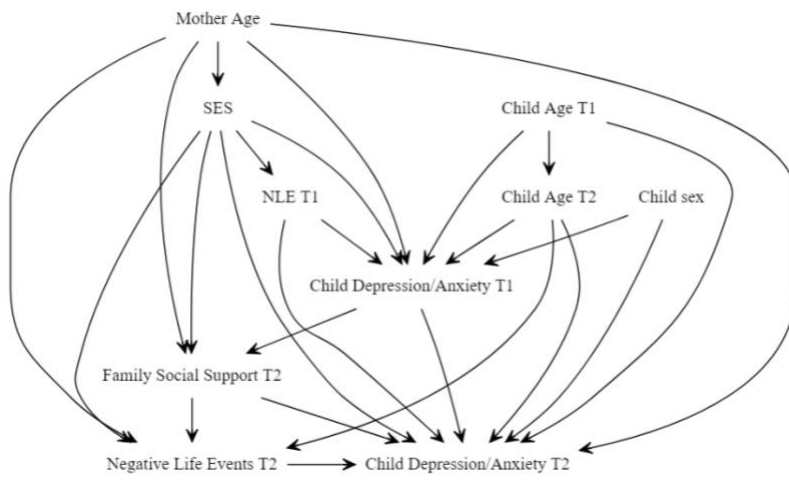

2) DAG for maternal-reported social support

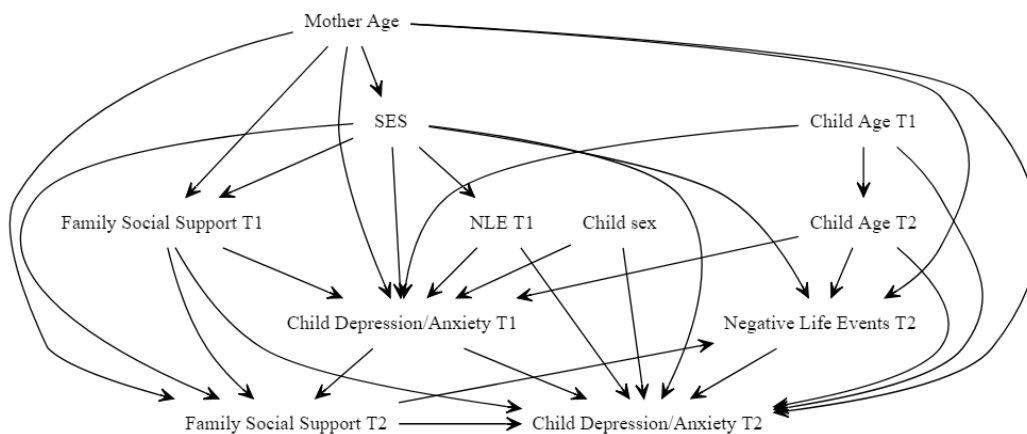

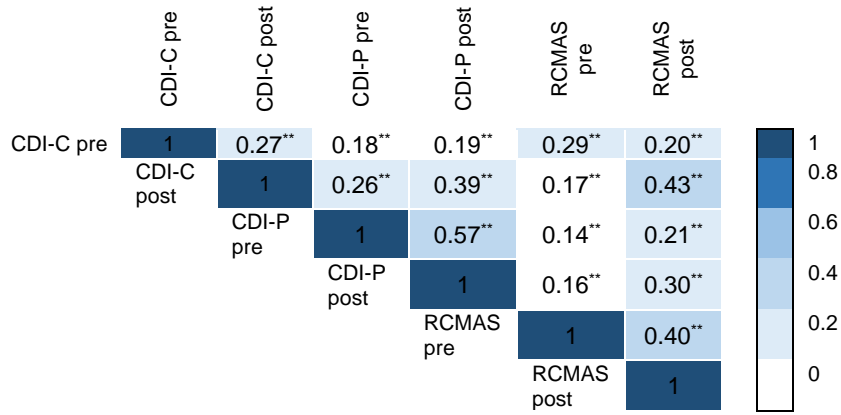

### Supplemental Figure 3. Correlations Between Childhood Mental Health Outcomes.

*Note.* CDI-C = Children's Depression Inventory child reported; CDI-P = Children's Depression Inventory parent reported; RCMAS = Revised Children's Manifest Anxiety Scale (child reported).

\* $p < 0.05$ ; \*\* $p < 0.001$

**Supplemental Table 1.** Descriptive characteristics for the original enrolled cohort and those included in our subset.

|                                                   | Original<br>PROGRESS cohort<br>(n=948) | Subset included in<br>this analysis<br>(n=464) | <i>p</i> -value |
|---------------------------------------------------|----------------------------------------|------------------------------------------------|-----------------|
| Child sex                                         |                                        |                                                |                 |
| Male                                              | 498 (53)                               | 236 (51)                                       | 0.56            |
| Female                                            | 450 (47)                               | 228 (49)                                       |                 |
| Maternal SES at birth                             |                                        |                                                |                 |
| Lower                                             | 486 (51)                               | 242 (52)                                       | 0.83            |
| Medium                                            | 356 (38)                               | 175 (38)                                       |                 |
| Higher                                            | 106 (11)                               | 47 (10)                                        |                 |
| Maternal education at birth                       |                                        |                                                |                 |
| Lower                                             | 385 (41)                               | 191 (41)                                       | 0.81            |
| Medium                                            | 334 (35)                               | 168 (36)                                       |                 |
| Higher                                            | 229 (24)                               | 105 (23)                                       |                 |
| Maternal age at birth, years                      | 28.0 ± 5.5                             | 28.2 ± 5.6                                     | 0.56            |
| Gestational age at birth, weeks                   | 38.2 ± 2.0                             | 38.3 ± 1.8                                     | 0.46            |
| Maternal negative life events<br>during pregnancy | 3.2 ± 2.1                              | 3.2 ± 2.0                                      | 0.78            |

**Supplemental Table 2.** Distribution of Negative Life Event, Social Support Scores, and Depressive and Anxiety Symptoms by Month of Assessment

|                               | May/June       | July           | August/Sept/Oct |
|-------------------------------|----------------|----------------|-----------------|
| Total, N (%)                  | 153 (33)       | 150 (32)       | 161 (35)        |
| Total NLE, mean $\pm$ SD      | 2.6 $\pm$ 1.7  | 2.9 $\pm$ 1.9  | 3.2 $\pm$ 2.0   |
| Social support, mean $\pm$ SD | 17.5 $\pm$ 2.3 | 17.0 $\pm$ 2.3 | 17.2 $\pm$ 2.5  |
| CDI-C, mean $\pm$ SD          | 54.9 $\pm$ 10  | 53.5 $\pm$ 8.7 | 55.4 $\pm$ 10.8 |
| CDI-P, mean $\pm$ SD          | 54.1 $\pm$ 9.6 | 52.3 $\pm$ 9.8 | 53.1 $\pm$ 9.6  |
| RCMAS, mean $\pm$ SD          | 50.1 $\pm$ 7.7 | 49.3 $\pm$ 8.2 | 50.5 $\pm$ 8.5  |

**Supplemental Table 3.** Percentage (No. (%)) of Children with CDI Depressive ( $T \geq 65$ ) and RCMAS Anxiety ( $T \geq 60$ ) Symptoms in the Clinical Range

|                | Before COV | During COV |
|----------------|------------|------------|
| <b>CDI-C</b>   |            |            |
| Overall        | 48 (10)    | 67 (14)    |
| Males          | 24 (10)    | 23 (10)    |
| Female         | 24 (10)    | 44 (19)*   |
| <b>CDI-P</b>   |            |            |
| Overall        | 42 (9)     | 57 (12)    |
| Males          | 29 (12)    | 28 (12)    |
| Female         | 13 (6)     | 28 (12)*   |
| <b>RCMAS-2</b> |            |            |
| Overall        | 54 (11)    | 56 (12)    |
| Males          | 25 (10)    | 19 (8)     |
| Female         | 29 (13)    | 37 (16)    |

*Note.* CDI-C = Children’s Depression Inventory child reported; CDI-P = Children’s Depression Inventory parent reported; RCMAS = Revised Children’s Manifest Anxiety Scale (child reported).

\* $p < 0.05$  for McNemar’s test comparing the proportion of children with clinically elevated symptoms from before to during COVID.
